# Supplementary material
Source: MDPI journal article supplement (https://www.mdpi.com/2504-477X/7/9/401)
Supplement: s1 [file s1]

## Supplementary Materials

# Fabrication of Sn(IV)porphyrin-Imbedded Silica Aerogel Composite

Min-Gyeong Jo, Nam-Gil Kim and Hee-Joon Kim\*

*Department of Chemistry and Bioscience, Kumoh National Institute of Technology  
61 Daehak-ro, Gumi 39177, Republic of Korea*

### List of contents

**Scheme S1.** Chemical reaction of SnP with HMDS.

**Figure S1.**  $^1\text{H}$  NMR spectrum for the reaction of SnP with HMDS in  $\text{CDCl}_3$ .

**Figure S2.** TGA curves for SnP (a), SiA (b), and SnP@SiA (c).

**Figure S3.** FT-IR spectra of SnP, SiA, SnP@SiA, and TMS@SiA (KBr pellets).

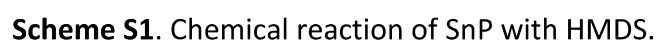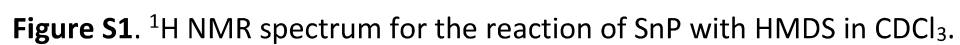

(a)

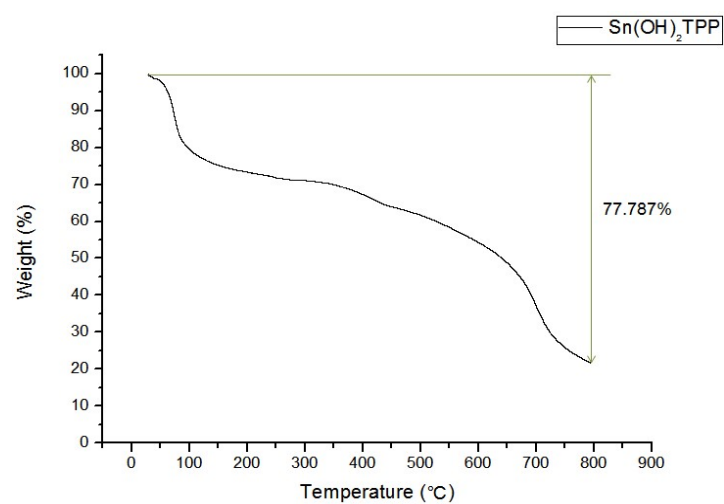

(b)

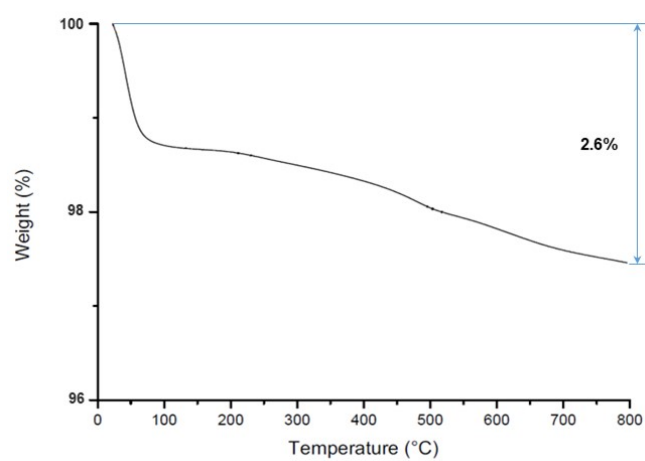

(c)

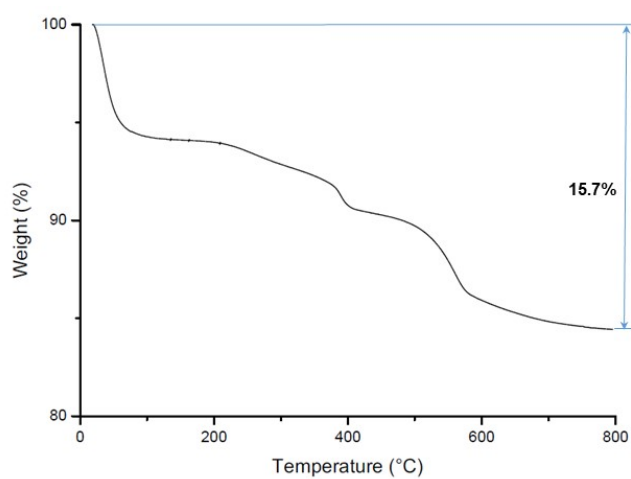

**Figure S2.** TGA curves for SnP (a), SiA (b), and SnP@SiA (c).

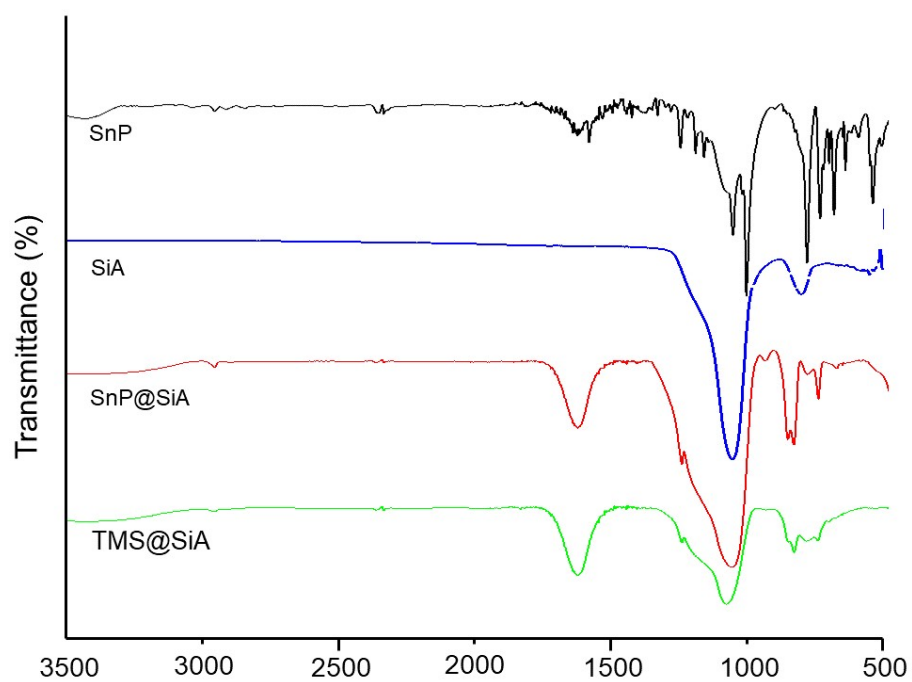

**Figure S3.** FT-IR spectra of SnP, SiA, SnP@SiA, and TMS@SiA (KBr pellets).
